# Supplementary material for: Binding Affinity and Mechanisms of Potential Antidepressants Targeting Human NMDA Receptors
Source: MDPI journal article supplement (doi:10.3390/molecules28114346), 2023-05-25
Supplement: s1 [file s1]

**Supporting Information (SI) for**  
**Binding affinity and mechanisms of potential**  
**antidepressants targeting human NMDA receptors**

Simin Ye<sup>1,2†</sup>, Yanqiang Han<sup>2†</sup>, Zhiyun Wei<sup>1\*</sup>, and Jinjin Li<sup>1,2\*</sup>

<sup>1</sup>Shanghai Key Laboratory of Maternal Fetal Medicine, Shanghai Institute of Maternal-Fetal Medicine and Gynecologic Oncology, Shanghai First Maternity and Infant Hospital, School of Medicine, Tongji University, Shanghai 200092, China.

<sup>2</sup>Key Laboratory for Thin Film and Microfabrication of Ministry of Education, Department of Micro/Nano-electronics, Shanghai Jiao Tong University, Shanghai 200240, China.

<sup>†</sup>These two authors contribute equally to this study.

\*Correspondence to: Jinjin Li (lijinjin@sjtu.edu.cn), Zhiyun Wei (zhiyun\_wei@163.com)

**Table S1** The total score and important energy terms of the selected eight drugs after docking with Rosetta3. The energy terms include binding energy, Coulombic electrostatic potential, solvation energy, sidechain-backbone hydrogen bond energy (hbond\_bb\_sc), attractive and repulsive energies between atoms in different residues.

| Conformations    | Total score | Bind energy | electrostatic | Solvation energy | hbond_bb_sc | attractive | repulsive |
|------------------|-------------|-------------|---------------|------------------|-------------|------------|-----------|
| s-ketamine       | -144.654    | -9.103      | -0.499        | 288.838          | -0.190      | -588.516   | 85.782    |
| r-ketamine       | -147.176    | -8.828      | -0.110        | 289.401          | -0.190      | -592.509   | 88.448    |
| ifenprodil       | -153.57     | -12.687     | -1.095        | 289.735          | -0.471      | -597.576   | 91.693    |
| traxoprodil      | -153.915    | -13.365     | -1.479        | 290.701          | -0.677      | -600.377   | 91.680    |
| Ro 25-6981       | -152.242    | -11.568     | 0.411         | 291.098          | 0.000       | -600.546   | 91.234    |
| Memantine        | -146.729    | -7.231      | -0.406        | 288.884          | -0.190      | -588.893   | 86.600    |
| Dextromethorphan | -150.362    | -10.635     | -0.063        | 289.428          | -0.190      | -594.154   | 87.531    |
| Lanicemine       | -147.129    | -8.365      | -0.635        | 289.476          | -0.190      | -590.556   | 86.555    |

**Table S2** The hydrogen bond analysis of the selected eight drugs after docking using cpptraj. Acceptor, DonorH, and Donor are the residue and atom name of the atoms involved in the hydrogen bond. AvgDist is the average distance of the bond when present, and AvgAng is the average angle of the bond when present.

| Conformations | Acceptor   | DonorH       | Donor       | AvgDist | AvgAng  |
|---------------|------------|--------------|-------------|---------|---------|
| S-ketamine    | SKE_170@O1 | ASN_160@HD22 | ASN_160@ND2 | 2.8644  | 158.146 |
| R-ketamine    | LEU_124@O  | RKE_170@H9   | RKE_170@N1  | 2.8816  | 162.275 |
|               | RKE_170@N1 | ASN_126@HD21 | ASN_126@ND2 | 2.9043  | 152.594 |
| ifenprodil    | LEU_165@O  | IF1_170@H27  | IF1_170@O2  | 2.7693  | 162.539 |
| traxoprodil   | TRA_170@O2 | TYR_69@HH    | TYR_69@OH   | 2.6340  | 139.755 |
| Ro 25-6981    | VAL_42@O   | RO1_170@H29  | RO1_170@O2  | 2.7397  | 162.840 |
|               | LEU_43@O   | RO1_170@H29  | RO1_170@O2  | 2.7294  | 163.301 |

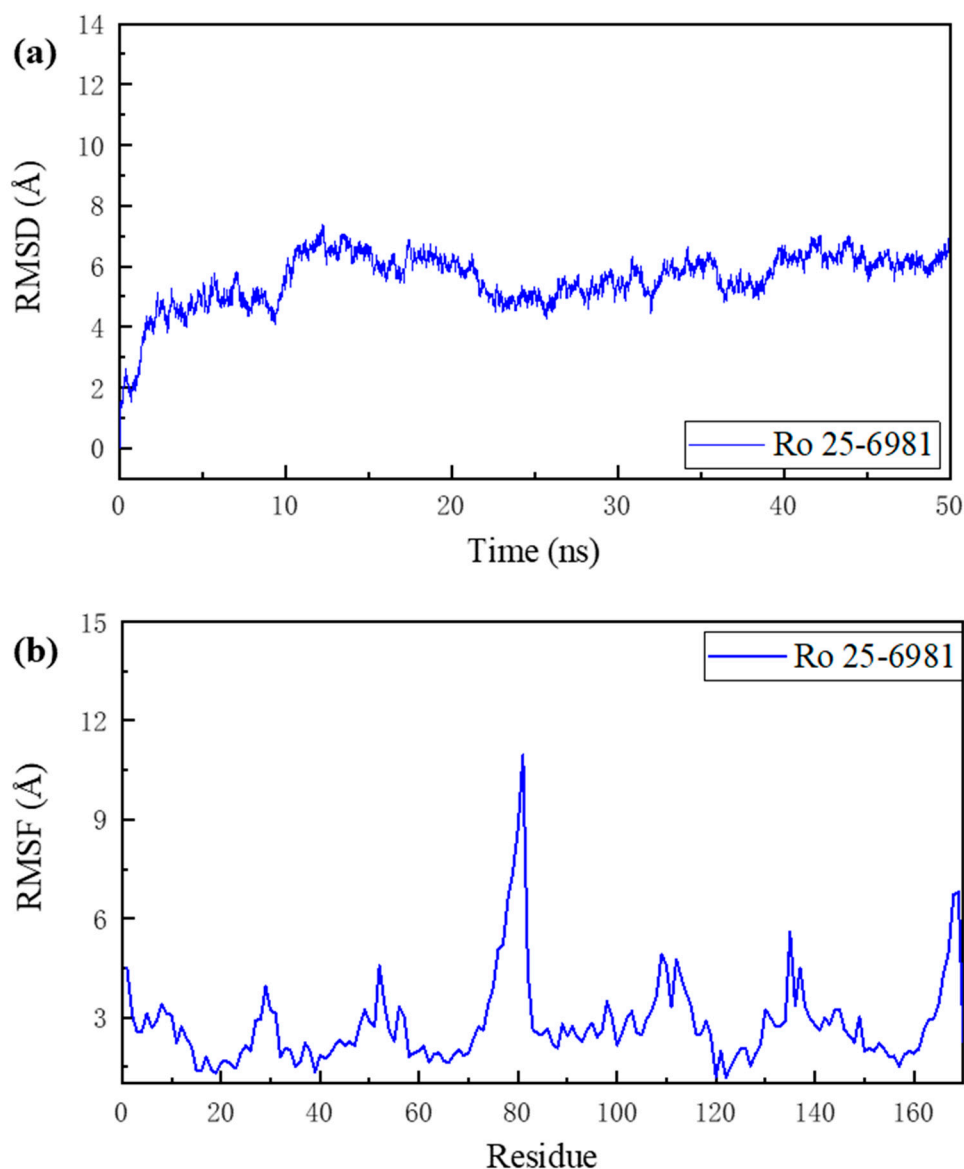

**Figure S1** Root mean square deviation (RMSD) and root mean square fluctuation (RMSF) of s-ketamine and the NMDA receptor complex in a 40-ns simulation MD. (a) The RMSD of all non-hydrogen atoms in the complex. (b) The RMSF of all non-hydrogen atoms in the NMDA receptor throughout the simulation.

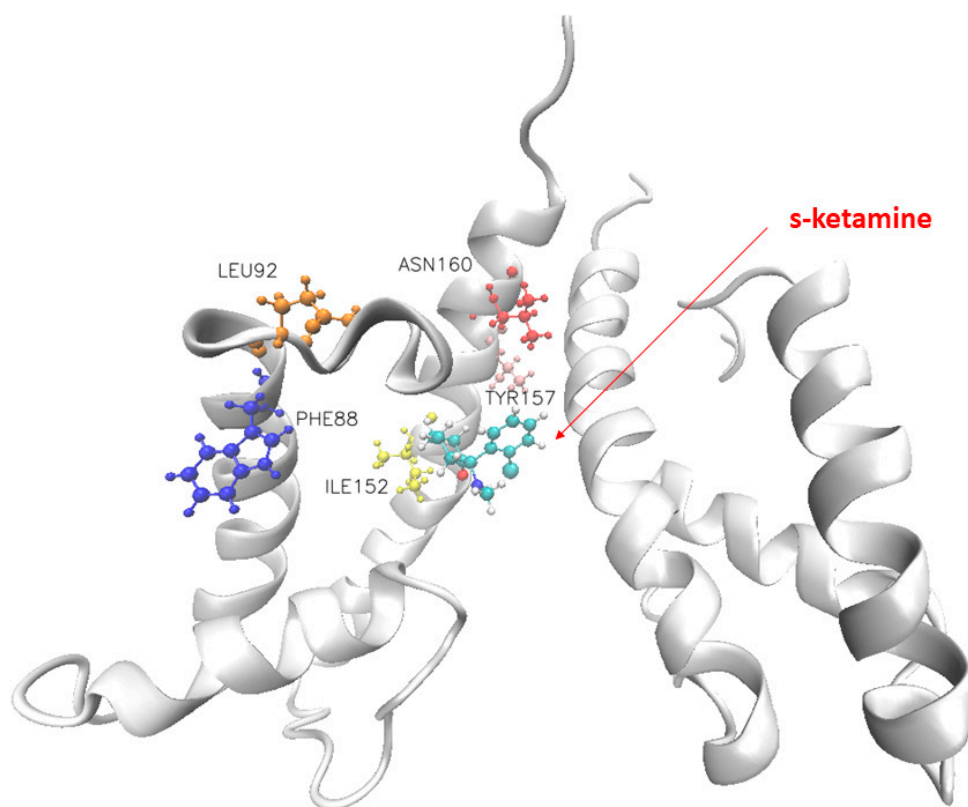

**Figure S2** Visualization of the docking conformation of the NMDA receptor and s-ketamine. The ball-and-stick model shows the binding pocket of five residues in the NMDA receptor with dominant binding contributions to ketamine.

**Table S3** Binding energy and decomposition of top 10 residues with dominant binding contributions of the NMDA receptor to s-ketamine, including van der Waals energy (vdW), electrostatic energy (Ele), polar solvation energy (Polar) and non-polar solvation energy (Non-polar).

| Residue       | TOTAL    | van der Waals | Electrostatic | Polar Solvation | Non-Polar Solv. |
|---------------|----------|---------------|---------------|-----------------|-----------------|
| <b>Phe88</b>  | -2.19287 | -2.04711      | -1.12602      | 1.110792        | -0.13053        |
| <b>Asn160</b> | -2.14918 | -0.94558      | -4.3375       | 3.318178        | -0.18428        |
| <b>Leu92</b>  | -1.78956 | -1.93294      | -0.47498      | 0.903851        | -0.28549        |
| <b>Tyr157</b> | -1.34733 | -1.25785      | -0.23522      | 0.212931        | -0.06719        |
| <b>Trp93</b>  | -1.27813 | -1.4686       | -0.2309       | 0.501495        | -0.08012        |
| <b>Val96</b>  | -0.99227 | -0.93196      | 0.324644      | -0.21474        | -0.17021        |
| <b>Ile153</b> | -0.8618  | -0.76555      | 0.223871      | -0.25334        | -0.06678        |
| <b>Ser156</b> | -0.58111 | -1.14993      | 0.636683      | 0.152842        | -0.2207         |
| <b>Trp121</b> | -0.56147 | -0.70984      | 0.034218      | 0.184792        | -0.07064        |
| <b>Gln89</b>  | -0.44267 | -0.92434      | -0.57443      | 1.113663        | -0.05757        |

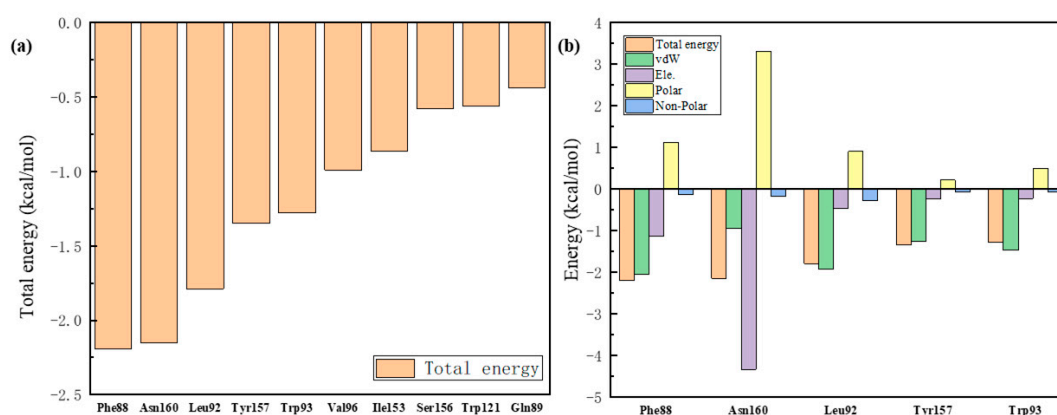

**Figure S3** Decomposition of the free energy of binding of key residues. (a) The 10 key residues with dominant binding contributions from the NMDA receptor to s-ketamine. (b) Decomposition of the energy of the five key residues and s-ketamine pairs into four energy terms, namely van der Waals interaction (vdW), electrostatic interaction (ele), polar solvation energy (polar), and nonpolar energy (nonpolar).

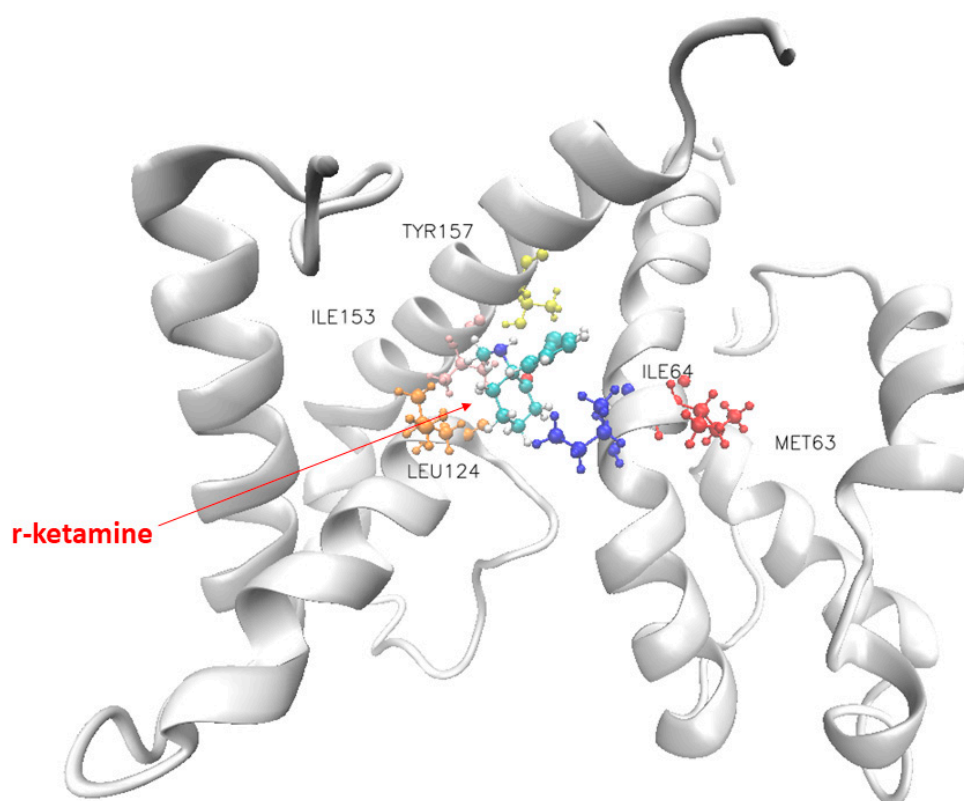

**Fig S4** Visualization of the docking conformation of the NMDA receptor and r-ketamine. The ball-and-stick model shows the binding pocket of five residues in the NMDA receptor with dominant binding contributions to r-ketamine.

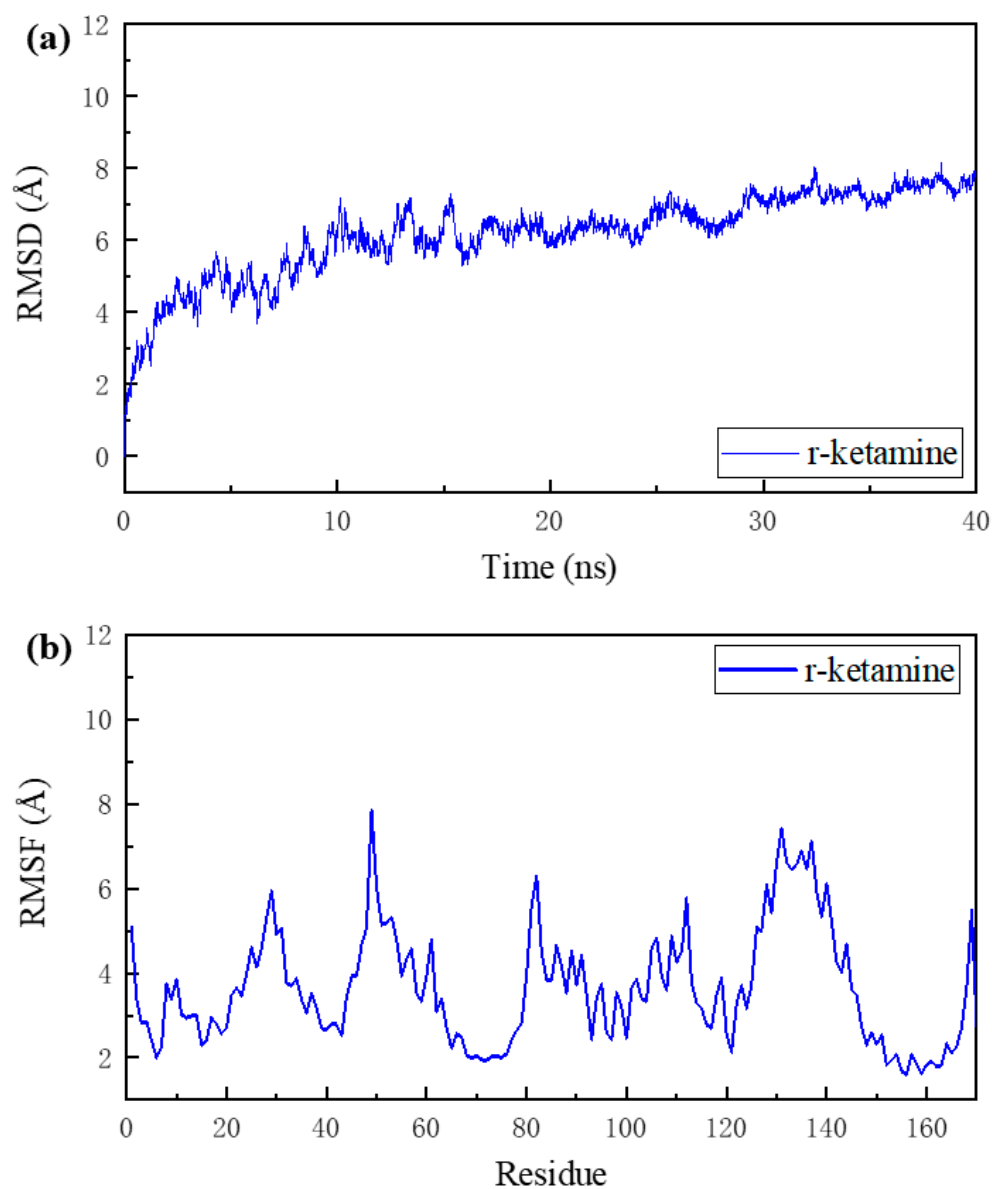

**Figure S5** Root mean square deviation (RMSD) and root mean square fluctuation (RMSF) of r-ketamine and the NMDA receptor complex in a 40-ns simulation MD. (a) The RMSD of all non-hydrogen atoms in the complex. (b) The RMSF of all non-hydrogen atoms in the NMDA receptor throughout the simulation.

**Table S4** Binding energy and decomposition of top 10 residues with dominant binding contributions of the NMDA receptor to r-ketamine, including van der Waals energy (vdW), electrostatic energy (Ele), polar solvation energy (Polar) and non-polar solvation energy (Non-polar).

| Residue        | TOTAL    | van der Waals | Electrostatic | Polar Solvation | Non-Polar Solv. |
|----------------|----------|---------------|---------------|-----------------|-----------------|
| <b>Met63</b>   | -1.76638 | -1.28128      | -1.22127      | 0.824329        | -0.08815        |
| <b>Ile64</b>   | -1.60067 | -1.51763      | -0.64395      | 0.767993        | -0.20708        |
| <b>Leu124</b>  | -1.37106 | -1.48867      | -0.72941      | 1.008282        | -0.16127        |
| <b>Ile153</b>  | -1.24179 | -1.20975      | -0.01193      | 0.119086        | -0.13919        |
| <b>Tyr157</b>  | -1.11015 | -1.32248      | -0.07776      | 0.417628        | -0.12753        |
| <b>Val154</b>  | -0.95168 | -0.93403      | -0.12226      | 0.206771        | -0.10216        |
| <b>Trp 146</b> | -0.68055 | -0.96497      | -0.23216      | 0.601987        | -0.0854         |
| <b>Leu125</b>  | -0.65302 | -0.72225      | 0.042748      | 0.106176        | -0.0797         |
| <b>Asn126</b>  | -0.61274 | -0.3845       | -0.82881      | 0.668924        | -0.06835        |
| <b>Phe88</b>   | -0.57836 | -0.7225       | 0.032405      | 0.238734        | -0.127          |

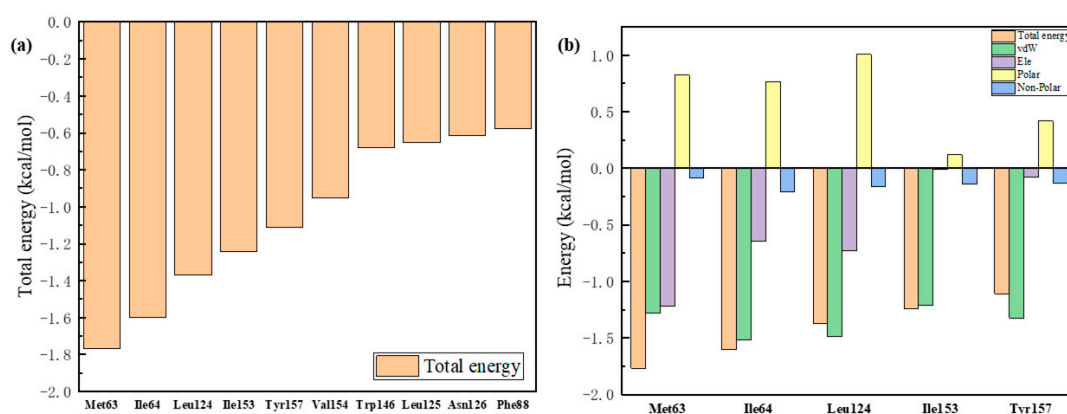

**Figure S6** Decomposition of the free energy of binding of key residues. (a) The 10 key residues with dominant binding contributions from the NMDA receptor to r-ketamine. (b) Decomposition of the energy of the five key residues and r-ketamine pairs into four energy terms, namely van der Waals interaction (vdW), electrostatic interaction (ele), polar solvation energy (polar), and nonpolar energy (nonpolar).



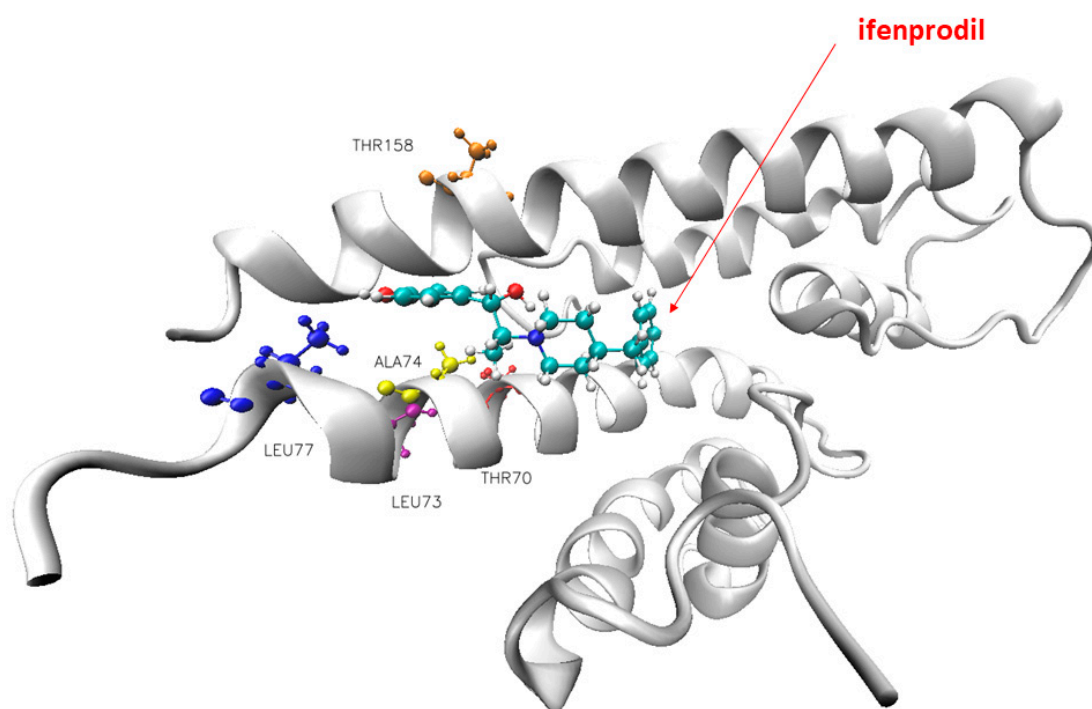

**Figure S7** Visualization of the docking conformation of the NMDA receptor and ifenprodil. The ball-and-stick model shows the binding pocket of five residues in the NMDA receptor with dominant binding contributions to ifenprodil.

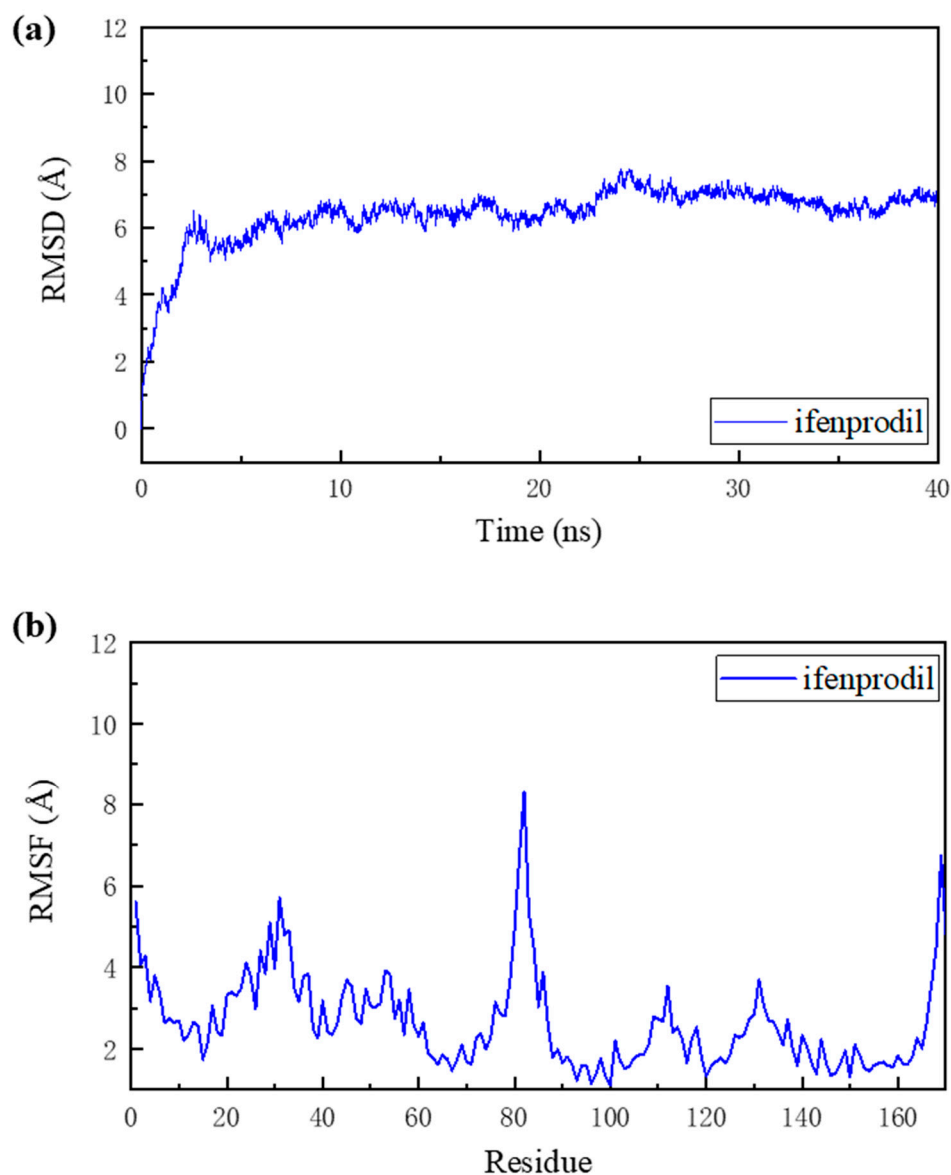

**Figure S8** Root mean square deviation (RMSD) and root mean square fluctuation (RMSF) of ifenprodil and the NMDA receptor complex in a 40-ns simulation MD. (a) The RMSD of all non-hydrogen atoms in the complex. (b) The RMSF of all non-hydrogen atoms in the NMDA receptor throughout the simulation.

**Table S5** Binding energy and decomposition of top 10 residues with dominant binding contributions of the NMDA receptor to ifenprodil, including van der Waals energy (vdW), electrostatic energy (Ele), polar solvation energy (Polar) and non-polar solvation energy (Non-polar).

| Residue | TOTAL    | van der Waals | Electrostatic | Polar Solvation | Non-Polar Solv. |
|---------|----------|---------------|---------------|-----------------|-----------------|
| Leu77   | 1.687922 | -1.54449      | -0.2605       | 0.427807        | -0.31074        |
| Thr70   | 1.583291 | -1.2928       | -0.07637      | -0.06165        | -0.15246        |
| Thr158  | 1.410215 | -1.59881      | -0.00882      | 0.402392        | -0.20498        |
| Leu 73  | 1.375455 | -1.14104      | 0.062973      | -0.14098        | -0.15641        |
| Ala74   | 0.991262 | -1.04664      | -0.01878      | 0.163475        | -0.08931        |
| Ala 162 | 0.933872 | -0.83479      | -0.24005      | 0.309635        | -0.16867        |
| Val 154 | 0.717936 | -0.64291      | 0.175276      | -0.17372        | -0.07658        |
| Leu 165 | 0.684936 | -0.39705      | -0.56417      | 0.302684        | -0.0264         |
| Leu 161 | 0.64939  | -0.49321      | -0.06996      | -0.06838        | -0.01785        |
| Met 151 | 0.635817 | -0.63292      | -0.11679      | 0.241465        | -0.12757        |

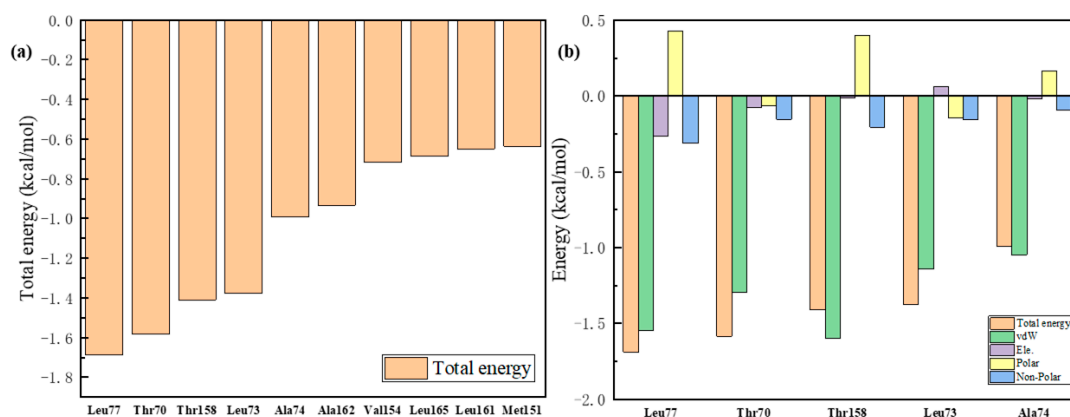

**Figure S9** Decomposition of the free energy of binding of key residues. (a) The 10 key residues with dominant binding contributions from the NMDA receptor to ifenprodil. (b) Decomposition of the energy of the five key residues and ifenprodil pairs into four energy terms, namely van der Waals interaction (vdW), electrostatic interaction (ele), polar solvation energy (polar), and nonpolar energy (nonpolar).

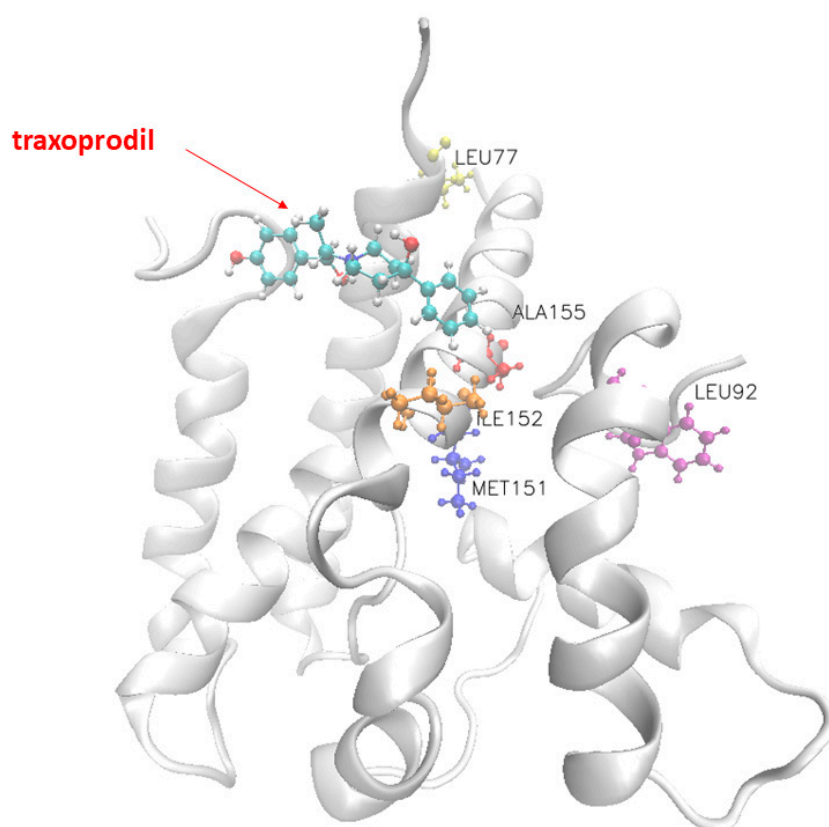

**Figure S10** Visualization of the docking conformation of the NMDA receptor and traxoprodil. The ball-and-stick model shows the binding pocket of five residues in the NMDA receptor with dominant binding contributions to traxoprodil.

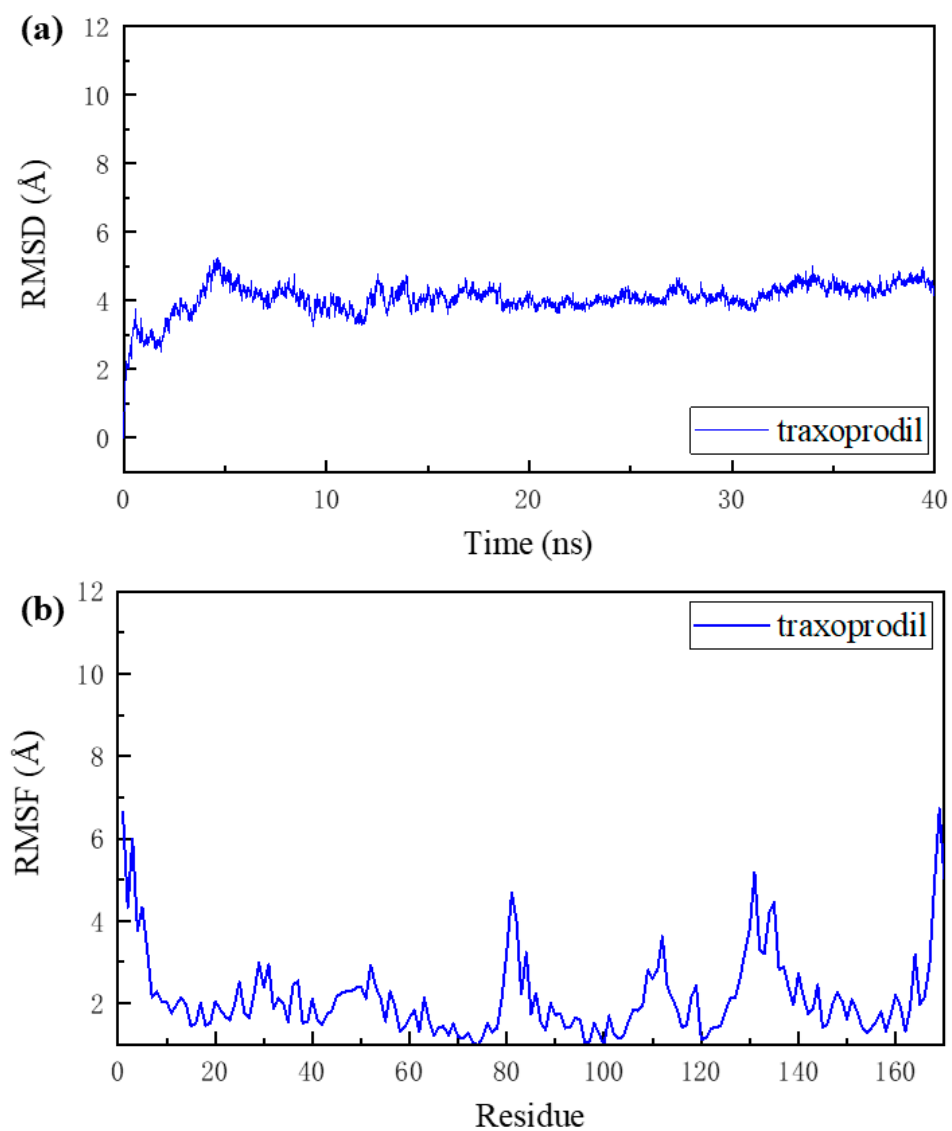

**Figure S11** Root mean square deviation (RMSD) and root mean square fluctuation (RMSF) of traxoprodil and the NMDA receptor complex in a 40-ns simulation MD. (a) The RMSD of all non-hydrogen atoms in the complex. (b) The RMSF of all non-hydrogen atoms in the NMDA receptor throughout the simulation.

**Table S6** Binding energy and decomposition of top 10 residues with dominant binding contributions of the NMDA receptor to traxprodil, including van der Waals energy (vdW), electrostatic energy (Ele), polar solvation energy (Polar) and non-polar solvation energy (Non-polar).

| Residue   | TOTAL    | van der Waals | Electrostatic | Polar Solvation | Non-Polar Solv. |
|-----------|----------|---------------|---------------|-----------------|-----------------|
| IleLE 152 | 1.574005 | -1.47964      | 0.002555      | 0.161645        | -0.25856        |
| Ala 155   | 1.50332  | -1.23123      | -0.23519      | 0.128362        | -0.16526        |
| Leu77     | 1.178284 | -1.27187      | -0.18614      | 0.51792         | -0.23819        |
| Leu92     | 0.85404  | -0.7672       | -0.01114      | 0.096595        | -0.17229        |
| Met 151   | 0.826756 | -0.8536       | -0.00697      | 0.186957        | -0.15314        |
| Met4      | 0.632208 | -0.50579      | -0.28928      | 0.237581        | -0.07472        |
| Pro6      | 0.607193 | -0.59218      | -0.30466      | 0.362017        | -0.07237        |
| Ala 159   | 0.572672 | -0.54884      | -0.03852      | 0.099731        | -0.08504        |
| Phe76     | 0.528461 | -0.63222      | -0.0879       | 0.311136        | -0.11948        |
| Leu73     | 0.515525 | -0.46042      | -0.04371      | 0.037983        | -0.04938        |

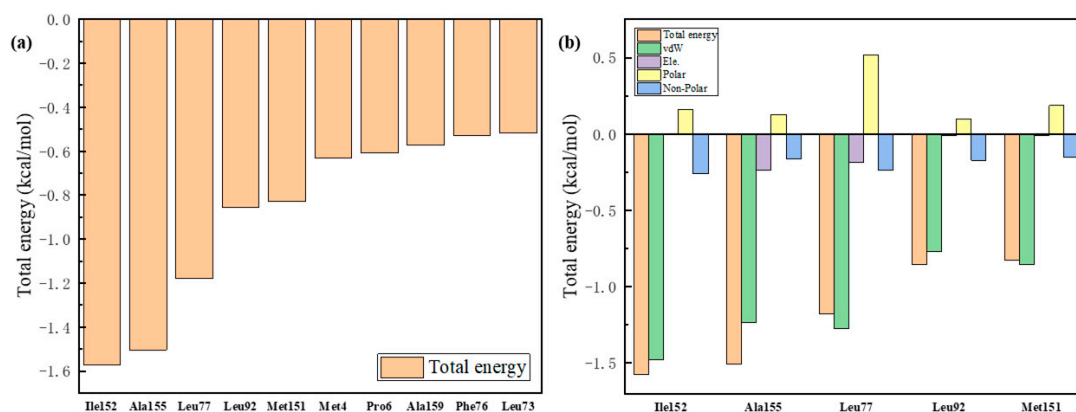

**Figure S12** Decomposition of the free energy of binding of key residues. (a) The 10 key residues with dominant binding contributions from the NMDA receptor to traxprodil. (b) Decomposition of the energy of the five key residues and traxprodil pairs into four energy terms, namely van der Waals interaction (vdW), electrostatic interaction (ele), polar solvation energy (polar), and nonpolar energy (nonpolar).

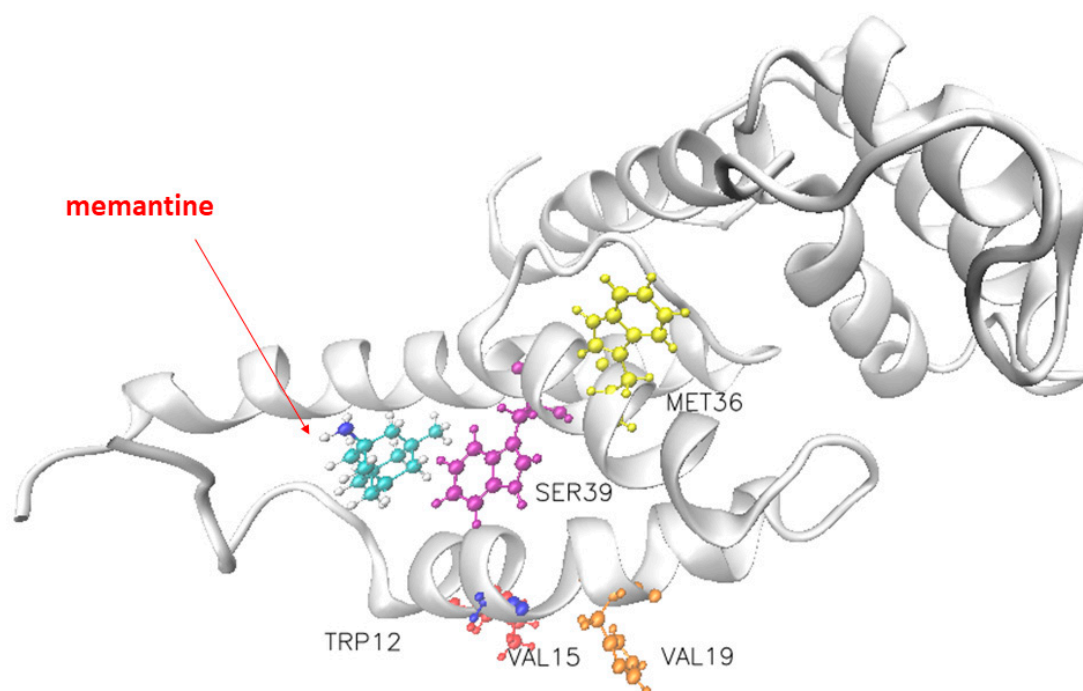

**Figure S13** Visualization of the docking conformation of the NMDA receptor and memantine. The ball-and-stick model shows the binding pocket of five residues in the NMDA receptor with dominant binding contributions to memantine.

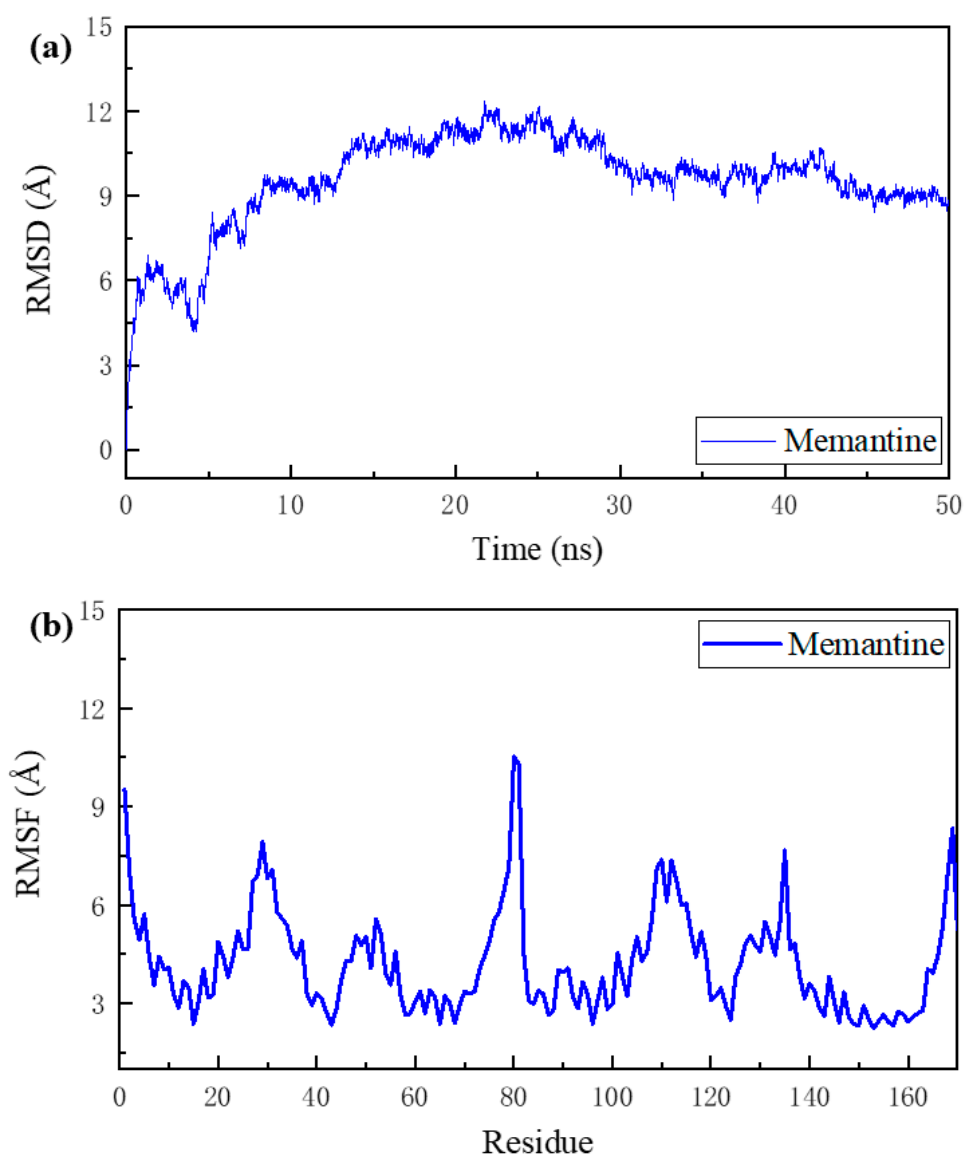

**Figure S14** Root mean square deviation (RMSD) and root mean square fluctuation (RMSF) of memantine and the NMDA receptor complex in a 50-ns simulation MD. (a) The RMSD of all non-hydrogen atoms in the complex. (b) The RMSF of all non-hydrogen atoms in the NMDA receptor throughout the simulation.



**Table S7** Binding energy and decomposition of top 10 residues with dominant binding contributions of the NMDA receptor to memantine, including van der Waals energy (vdW), electrostatic energy (Ele), polar solvation energy (Polar) and non-polar solvation energy (Non-polar)

| Residue | TOTAL    | van der Waals | Electrostatic | Polar Solvation | Non-Polar Solv. |
|---------|----------|---------------|---------------|-----------------|-----------------|
| Met36   | -1.22973 | -1.32584      | -0.12447      | 0.452622        | -0.23204        |
| Val15   | -1.1356  | -0.98899      | 0.04405       | -0.12713        | -0.06353        |
| Trp12   | -0.95294 | -1.6389       | -0.16025      | 1.02093         | -0.17472        |
| Val19   | -0.93217 | -0.7985       | 0.014264      | -0.05241        | -0.09551        |
| Trp40   | -0.91198 | -1.61507      | -0.19885      | 1.071532        | -0.16959        |
| Gly16   | -0.67071 | -0.69202      | -0.00529      | 0.159731        | -0.13312        |
| Met4    | -0.64472 | -0.71532      | -0.04542      | 0.267005        | -0.15098        |
| Ser39   | -0.42161 | -0.50578      | 0.012915      | 0.114542        | -0.04329        |
| Leu43   | -0.31954 | -0.30826      | 0.022955      | -0.00696        | -0.02728        |
| Leu13   | -0.23787 | -0.2985       | -0.01988      | 0.110294        | -0.02979        |

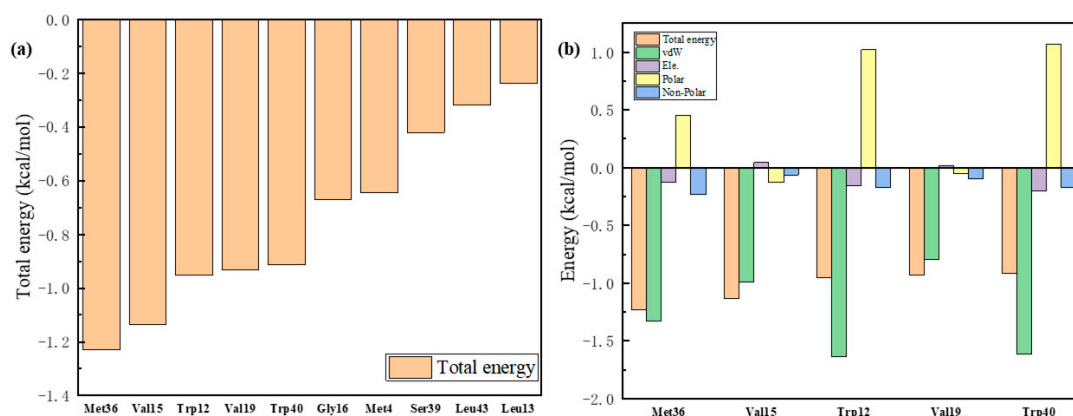

**Figure S15** Decomposition of the free energy of binding of key residues. (a) The 10 key residues with dominant binding contributions from the NMDA receptor to memantine. (b) Decomposition of the energy of the five key residues and memantine pairs into four energy terms, namely van der Waals interaction (vdW), electrostatic interaction (ele), polar solvation energy (polar), and nonpolar energy (nonpolar).

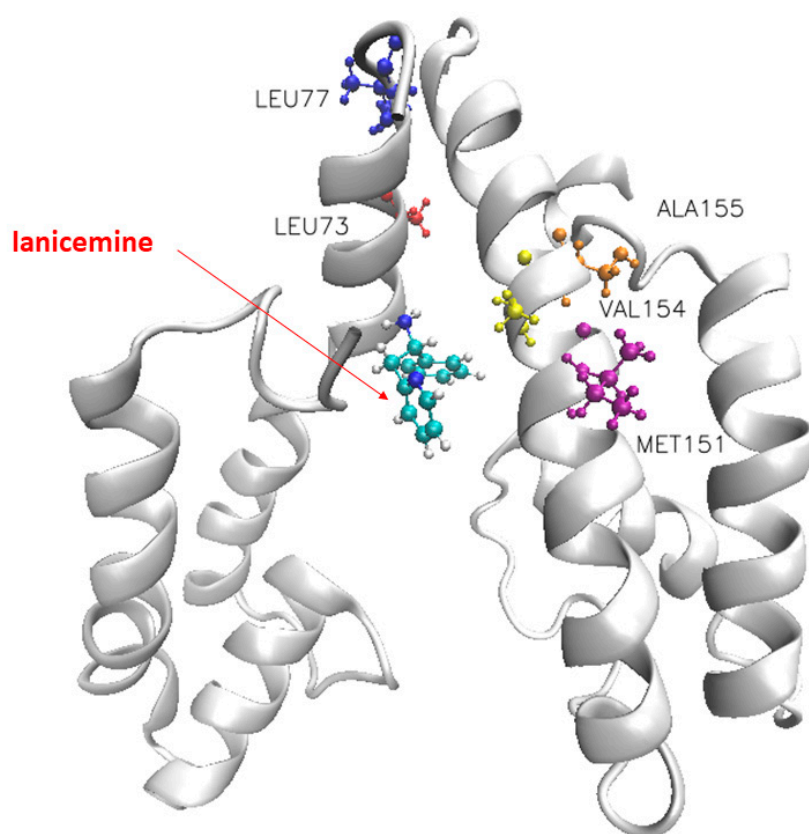

**Figure S16** Visualization of the docking conformation of the NMDA receptor and lanicemine. The ball-and-stick model shows the binding pocket of five residues in the NMDA receptor with dominant binding contributions to lanicemine.

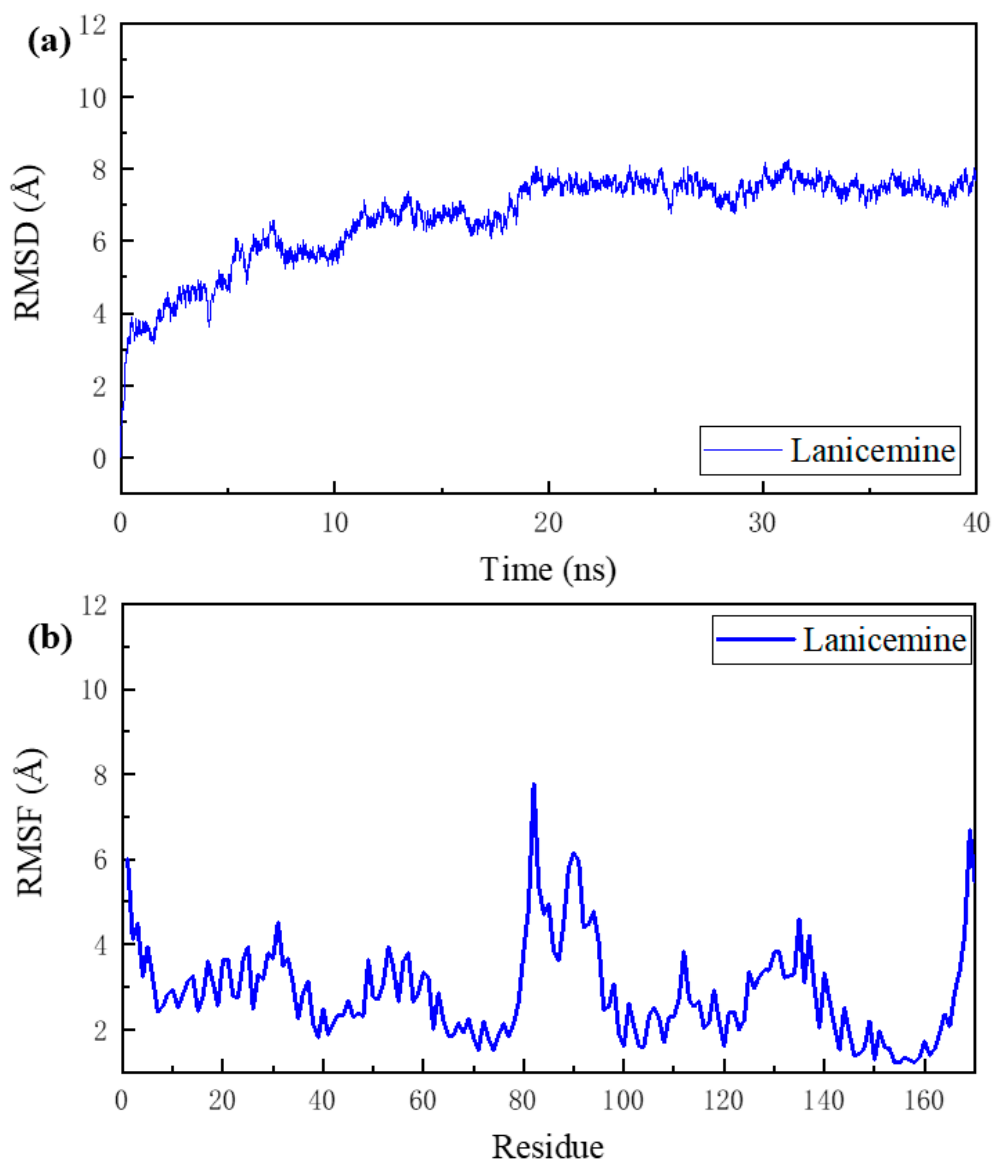

**Figure S17** Root mean square deviation (RMSD) and root mean square fluctuation (RMSF) of lanicemine and the NMDA receptor complex in a 40-ns simulation MD. (a) The RMSD of all non-hydrogen atoms in the complex. (b) The RMSF of all non-hydrogen atoms in the NMDA receptor throughout the simulation.

**Table S8** Binding energy and decomposition of top 10 residues with dominant binding contributions of the NMDA receptor to lanicemine, including van der Waals energy (vdW), electrostatic energy (Ele), polar solvation energy (Polar) and non-polar solvation energy (Non-polar).

| Residue        | Total energy | van der Waals | Electrostatic | Polar Solvation | Non-Polar Solv. |
|----------------|--------------|---------------|---------------|-----------------|-----------------|
| <b>Ala155</b>  | -1.38505     | -1.26383      | -0.24229      | 0.345445        | -0.22439        |
| <b>Leu73</b>   | -0.74935     | -0.66406      | 0.055282      | -0.01769        | -0.12289        |
| <b>Met151</b>  | -0.72665     | -0.75208      | -0.01362      | 0.191402        | -0.15235        |
| <b>Leu77</b>   | -0.70765     | -0.67469      | -0.00131      | 0.137066        | -0.16871        |
| <b>Val154</b>  | -0.67319     | -0.57298      | -0.04368      | 0.009777        | -0.0663         |
| <b>Thr158</b>  | -0.45623     | -0.5595       | -0.13422      | 0.267106        | -0.02961        |
| <b>Ile 152</b> | -0.44839     | -0.39728      | -0.03973      | 0.052193        | -0.06358        |
| <b>Ala159</b>  | -0.39072     | -0.37716      | -0.01477      | 0.083784        | -0.08258        |
| <b>Phe3</b>    | -0.38615     | -0.46228      | -0.09865      | 0.280917        | -0.10614        |
| <b>Thr70</b>   | -0.19303     | -0.28424      | -0.07625      | 0.191146        | -0.02369        |

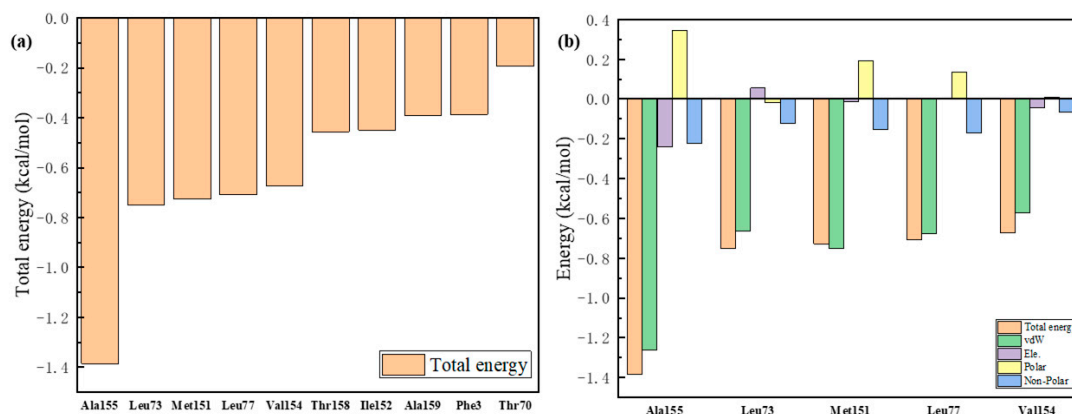

**Figure S18** Decomposition of the free energy of binding of key residues. (a) The 10 key residues with dominant binding contributions from the NMDA receptors to lanicemine. (b) Decomposition of the energy of the five key residues and lanicemine pairs into four energy terms, namely van der Waals interaction (vdW), electrostatic interaction (ele), polar solvation energy (polar), and nonpolar energy (nonpolar).

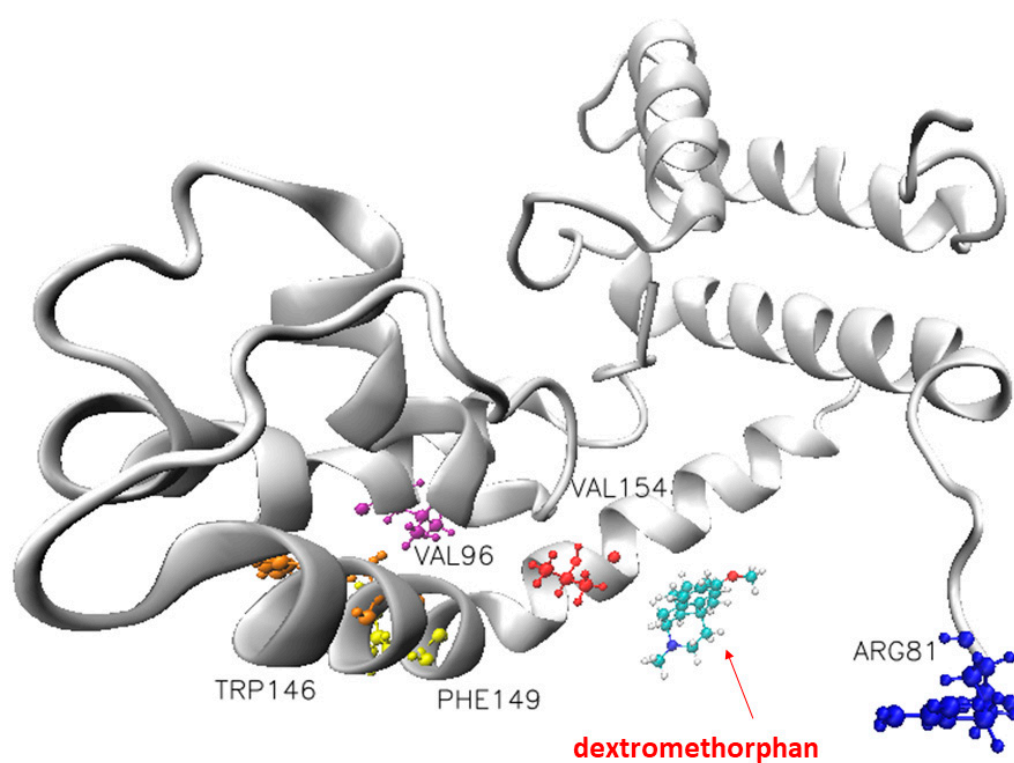

**Figure S19** Visualization of the docking conformation of the NMDA receptor and dextromethorphan. The ball-and-stick model shows the binding pocket of five residues in the NMDA receptor with dominant binding contributions to dextromethorphan.

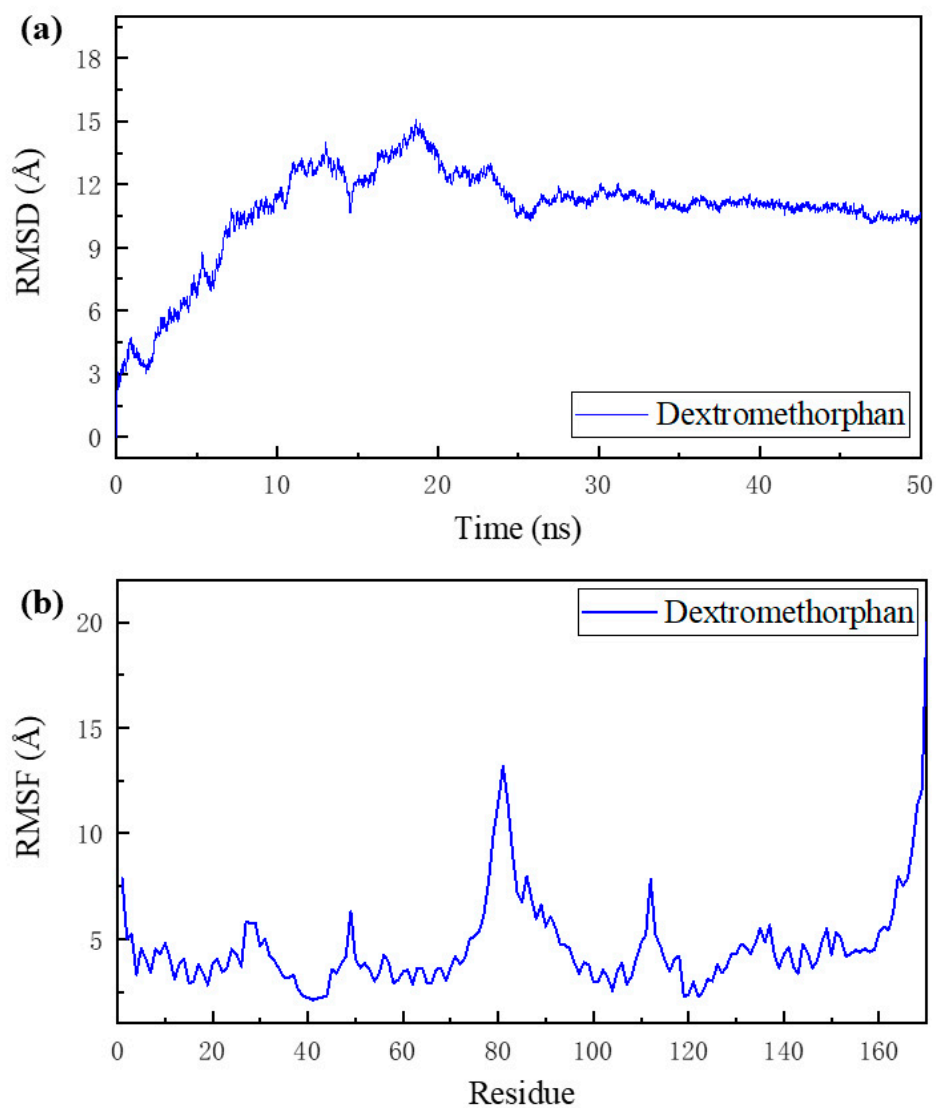

**Figure S20** Root mean square deviation (RMSD) and root mean square fluctuation (RMSF) of dextromethorphan and the NMDA receptor complex in a 50-ns simulation MD. (a) The RMSD of all non-hydrogen atoms in the complex. (b) The RMSF of all non-hydrogen atoms in the NMDA receptor throughout the simulation.

**Table S9** Binding energy and decomposition of top 10 residues with dominant binding contributions of NMDA receptor to dextromethorphan, including van der Waals energy (vdW), electrostatic energy (Ele), polar solvation energy (Polar) and non-polar solvation energy (Non-polar).

| Residue | TOTAL    | van der Waals | Electrostatic | Polar Solvation | Non-Polar Solv. |
|---------|----------|---------------|---------------|-----------------|-----------------|
| Val96   | -0.5848  | -0.51287      | -0.01389      | 0.03004         | -0.08808        |
| Phe149  | -0.54639 | -0.74609      | 0.029353      | 0.311368        | -0.14101        |
| Trp146  | -0.34524 | -0.61197      | -0.03936      | 0.387806        | -0.08171        |
| Arg81   | -0.34509 | -0.57003      | -0.23569      | 0.556045        | -0.09541        |
| Val154  | -0.26438 | -0.24528      | -0.02877      | 0.041169        | -0.0315         |
| Ser99   | -0.25508 | -0.31555      | -0.16573      | 0.298333        | -0.07213        |
| Val100  | -0.20423 | -0.20154      | -0.00052      | 0.012124        | -0.0143         |
| Ile153  | -0.17272 | -0.14407      | -0.02008      | 0.001572        | -0.01013        |
| Val103  | -0.15839 | -0.13281      | -0.00159      | -0.00228        | -0.02172        |
| Leu77   | -0.15532 | -0.15283      | 0.003647      | 0.022507        | -0.02864        |

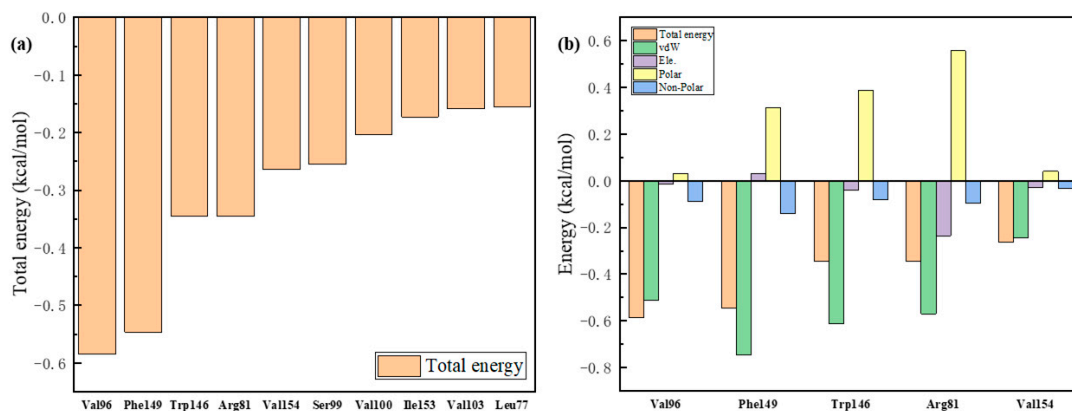

**Figure S21** Decomposition of the free energy of binding of key residues. (a) The 10 key residues with dominant binding contributions from the NMDA receptor to dextromethorphan. (b) Decomposition of the energy of the five key residues and dextromethorphan pairs into four energy terms, namely van der Waals interaction (vdW), electrostatic interaction (ele), polar solvation energy (polar), and nonpolar energy (nonpolar).
